# Supplementary material for: The antibody loci of the domestic goat (Capra hircus)
Source: PubMed Central journal article supplement (PMC5899754; doi:10.1007/s00251-017-1033-3), 2017-10-23
Supplement: 251_2017_1033_MOESM1_ESM.pdf [file 251_2017_1033_MOESM1_ESM.pdf]

## Supplementary Material

### The antibody loci of the domestic goat (*Capra hircus*)

John C. Schwartz<sup>1</sup>, Rebecca L. Philp<sup>1,2</sup>, Derek M. Bickhart<sup>3</sup>, Timothy P. L. Smith<sup>4</sup>, and John A. Hammond<sup>1†</sup>

<sup>1</sup> Livestock Viral Diseases Programme, The Pirbright Institute, Pirbright, Surrey GU24 0NF, UK

<sup>2</sup> Boyd Orr Centre for Population and Ecosystem Health, Institute of Biodiversity, Animal Health and Comparative Medicine, College of Medical, Veterinary and Life Sciences, University of Glasgow, Glasgow G12 8QQ, UK

<sup>3</sup> Cell Wall Biology and Utilization Research, USDA-ARS, Madison, WI 53706, USA

<sup>4</sup> Meat Animal Research Center, USDA-ARS, Clay Center, NE 68933, USA

† Corresponding author

Phone: (+44)1483231397

E-mail: [john.hammond@pirbright.ac.uk](mailto:john.hammond@pirbright.ac.uk)

## **Table of Contents**

Supplementary Table 1 – qPCR primers

### **Heavy Chain**

#### ***IGH locus***

Supplementary Table 2 – *IGHV* genomic features

Supplementary Figure 1 – *IGHV* protein display

Supplementary Figure 2 – *IGHD* genomic features

Supplementary Figure 3 – *IGHJ* genomic features

### **Light Chain**

Supplementary Figure 4 – *IGLC* and *IGKC* protein display

#### ***IGL locus***

Supplementary Figure 5 – *IGLJ* genomic features

Supplementary Table 3 – *IGLV* genomic features

Supplementary Figure 6 – *IGLV* protein display

#### ***IGK locus***

Supplementary Table 4 – *IGKV* genomic features

Supplementary Figure 7 – *IGKV* protein display

Supplementary Table 1 – qPCR primers

| <b>gene</b> | <b>orientation</b> | <b>sequence (5'-)</b> |
|-------------|--------------------|-----------------------|
| <i>ACTB</i> | F                  | ACCGTGAGAAGATGACCCAG  |
| <i>ACTB</i> | R                  | AGGAAGGAAGGCTGGAAGAG  |
| <i>SDHA</i> | F                  | GCTCTCCTACGTTGACATCA  |
| <i>SDHA</i> | R                  | AAGCCTCAGTCTCCTCAGTA  |
| <i>PPIA</i> | F                  | GCATCTTGTCATGGCAAAT   |
| <i>PPIA</i> | R                  | TTCATGCCCTCTTTACCTT   |
| <i>IGLC</i> | F                  | CTCCAAACWGAGCAACAGCA  |
| <i>IGLC</i> | R                  | CTTCACTGTCTTCKTCACGG  |
| <i>IGKC</i> | F                  | TGTCGTGTGCTTGGTGAATG  |
| <i>IGKC</i> | R                  | TTCTTGCTGTCCTGGTCTGT  |

*ACTB*, beta-actin

*SDHA*, succinate dehydrogenase complex flavoprotein subunit A

*PPIA*, peptidylprolyl isomerase A

Supplementary Table 2 – *IGHV* genomic features

| <i>IGHV</i><br>gene | Fct            | Octamer<br>(promoter) | bp  | ini. | L-PART1<br>(exon 1)<br>(bp) | intron<br>(bp) | splice<br>sites | V-EXON<br>(exon 2)<br>(bp) | V-RS     |                |            | Accession #  | Start of<br>V-EXON |
|---------------------|----------------|-----------------------|-----|------|-----------------------------|----------------|-----------------|----------------------------|----------|----------------|------------|--------------|--------------------|
|                     |                |                       |     |      |                             |                |                 |                            | HEPTAMER | SPACER<br>(bp) | NONAMER    |              |                    |
| <i>IGHV2-1</i>      | P <sup>1</sup> | -                     | -   | -    | -                           | -              | -               | 282                        | CACAGTG  | 23             | ACACCACCA  | NC_030828    | 68,993,831         |
| <i>IGHV2-2</i>      | P <sup>2</sup> | GTGCACAT              | 107 | ATG  | 46                          | 78             | TC/GG           | 305                        | CACAGTG  | 23             | CACTAGCCA  | NC_030828    | 68,976,671         |
| <i>IGHV1-3</i>      | F              | ATGCAAAT              | 107 | ATG  | 46                          | 82             | GT/AG           | 304                        | CACAGTG  | 23             | ACAAAAACC  | NC_030828    | 68,974,829         |
| <i>IGHV2-4</i>      | P <sup>2</sup> | GTGCACAT              | 107 | ATG  | 46                          | 86             | GG/GG           | 305                        | CACAGTG  | 24             | CACTAGCCA  | NC_030828    | 68,963,254         |
| <i>IGHV1-5</i>      | F              | ATGCAAAT              | 107 | ATG  | 46                          | 82             | GT/AG           | 304                        | CACAGTG  | 23             | ACAAAAACC  | NC_030828    | 68,961,453         |
| <i>IGHV3-6</i>      | P <sup>1</sup> | -                     | -   | -    | -                           | -              | -/GG            | 305                        | CACAGTG  | 23             | CACTAGCCA  | NC_030828    | 68,956,171         |
| <i>IGHV2-7</i>      | P <sup>1</sup> | -                     | -   | -    | -                           | -              | -/AG            | 303                        | CACAGTG  | 23             | CCAGAAAACC | NC_030828    | 68,949,593         |
| <i>IGHV1-8</i>      | F              | GTGCAAAT              | 107 | ATG  | 46                          | 82             | GT/AG           | 304                        | CACAGTG  | 25             | ACAAAAACC  | NC_030828    | 68,946,570         |
| <i>IGHV1S9</i>      | P <sup>3</sup> | ATGCAAAT              | 107 | ATG  | 46                          | 71             | GG/AG           | 304                        | CACAGTG  | 24             | ACGAAAACC  | LWLT01000331 | 3,435              |
| <i>IGHV1S10</i>     | P <sup>4</sup> | ATGCAAAT              | 105 | ATG  | 46                          | 71             | TG/AG           | 295                        | CACAGTG  | 22             | ACGAAAACC  | LWLT01000331 | 31,721             |
| <i>IGHV1S11</i>     | P <sup>5</sup> | ATGCAAAT              | 107 | ATG  | 46                          | 71             | TG/AG           | 304                        | CACAGTG  | 23             | ACAAAAACT  | LWLT01000361 | 29,484             |
| <i>IGHV3S12</i>     | P <sup>1</sup> | -                     | -   | -    | -                           | -              | -/AG            | 303                        | CACAGTG  | 23             | CCAGAAAACC | LWLT01000361 | 24,203             |
| <i>IGHV1S13</i>     | P <sup>4</sup> | ATGCAAAT              | 103 | ATG  | 46                          | 71             | TG/AG           | 304                        | CACAGTG  | 23             | ACGAAAACC  | LWLT01000364 | 6,201              |
| <i>IGHV3S14</i>     | P <sup>1</sup> | -                     | -   | -    | -                           | -              | -/GG            | 305                        | CACAGTG  | 23             | CACAAGTCA  | LWLT01000364 | 22,043             |
| <i>IGHV1S15</i>     | F              | ATGCAAAT              | 107 | ATG  | 52                          | 76             | GT/AG           | 304                        | CACAGTG  | 23             | ACAAAAACC  | LWLT01000364 | 23,792             |
| <i>IGHV2S16</i>     | P <sup>1</sup> | -                     | -   | -    | -                           | -              | -/AG            | 303                        | CACAGTG  | 23             | CCAGAAAACC | LWLT01000364 | 29,080             |
| <i>IGHV2S17</i>     | P <sup>1</sup> | -                     | -   | -    | -                           | -              | -/AG            | 297                        | CACAGTG  | 23             | ACACCAGCC  | LWLT01000390 | 7,585              |
| <i>IGHV2S18</i>     | P <sup>6</sup> | GTGCACAT              | 107 | GTG  | 46                          | 86             | GG/GG           | 303                        | GACAGTG  | 23             | CACTAGCCA  | LWLT01000390 | 20,777             |
| <i>IGHV1S19</i>     | P <sup>5</sup> | ATGCAAAT              | 107 | ATG  | 46                          | 71             | TG/AG           | 304                        | CACAGTG  | 23             | ACAAAAACT  | LWLT01000390 | 22,571             |
| <i>IGHV3S20</i>     | P <sup>1</sup> | -                     | -   | -    | -                           | -              | -/AG            | 303                        | CACAGTG  | 23             | CCAGAAAACC | LWLT01000390 | 27,850             |
| <i>IGHV2S21</i>     | P <sup>6</sup> | GTGCACAT              | 107 | GTG  | 46                          | 86             | GG/GG           | 299                        | CACAGTG  | 23             | CACTAGCCA  | LWLT01000862 | 28,010             |
| <i>IGHV1S22</i>     | P <sup>3</sup> | ATGCAAAT              | 107 | ATG  | 46                          | 71             | TG/AG           | 303                        | CACAGTG  | 19             | CCAAAAACC  | LWLT01000862 | 26,223             |
| <i>IGHV3S23</i>     | P <sup>1</sup> | -                     | -   | -    | -                           | -              | -/AG            | 303                        | CACAGTG  | 23             | CCACAAACC  | LWLT01000862 | 20,940             |
| <i>IGHV1S24</i>     | P <sup>3</sup> | ATGCAAAT              | 107 | ATG  | 46                          | 71             | TG/AG           | 303                        | CACAGTG  | 23             | ACGAAAACC  | LWLT01000862 | 12,431             |
| <i>IGHV3S25</i>     | P <sup>1</sup> | -                     | -   | -    | -                           | -              | -/AG            | 304                        | CACAGTG  | 23             | CCAGAAAACC | LWLT01001482 | 19,957             |
| <i>IGHV2S26</i>     | P <sup>3</sup> | ATGGACAT              | 105 | ATG  | 44                          | 82             | GG/AG           | 297                        | CACAGTG  | 23             | ACACCAGCC  | LWLT01001482 | 13,657             |
| <i>IGHV2S27</i>     | P <sup>2</sup> | GTGCACAT              | 106 | ATG  | 46                          | 87             | GG/GG           | 307                        | CACAGTG  | 23             | ACTAACC    | LWLT01001482 | 685                |
| <i>IGHV2S28</i>     | P <sup>2</sup> | GTGCACAT              | 107 | ATG  | 45                          | 86             | GG/GG           | 291                        | CACAGTG  | 23             | CACTAGCCA  | LWLT01008200 | 1,691              |
| <i>IGHV1S29</i>     | P <sup>1</sup> | -                     | -   | -    | -                           | -              | -/AG            | 300                        | CACAGTG  | 23             | ACAAAAACT  | LWLT01008200 | 3,471              |
| <i>IGHV3S30</i>     | P <sup>1</sup> | -                     | -   | -    | -                           | -              | -/AG            | 301                        | CACAGTG  | 23             | CCAGAAAACC | LWLT01008200 | 8,740              |
| <i>IGHV2S31</i>     | P <sup>1</sup> | -                     | -   | -    | -                           | -              | -/AG            | 297                        | CACAGTG  | 23             | ACACCAGCC  | LWLT01008318 | 11,961             |
| <i>IGHV2S32</i>     | P <sup>1</sup> | -                     | -   | -    | -                           | -              | -/GG            | 302                        | CACAGTG  | 23             | ACTAACC    | LWLT01010025 | 10,965             |
| <i>IGHV1S33</i>     | P <sup>3</sup> | ATGCAAAT              | 107 | ATG  | 46                          | 71             | TG/AG           | 305                        | CACAGTG  | 19             | CCAAAAACC  | LWLT01010025 | 9,190              |
| <i>IGHV3S34</i>     | P <sup>1</sup> | -                     | -   | -    | -                           | -              | -/AG            | 303                        | CACAGTG  | 23             | CCAGAAAACC | LWLT01010025 | 3,904              |

Fct functionality, F functional, P pseudogene

1; exon 1 is missing, frameshifts and stop codons in exon 2

2; multiple frameshifts and stop codons in exon 2

3; stop codon in exon 1, frameshifts and stop codons in exon 2

4; stop codon in exon 1

5; stop codon in exon 1, mutated first conserved cysteine (C23>F)

6; mutated start codon (M>V), frameshifts and stop codons in exon 2

|                   | FR1-IMGT<br>(1-26) |             | CDR1-IMGT<br>(27-38) |          | FR2-IMGT<br>(39-55) |            |              |            | CDR2-IMGT<br>(56-65) |          | FR3-IMGT<br>(66-104) |       |              |       | CDR3-IMGT<br>(105-) |       |               |       |       |       |       |   |
|-------------------|--------------------|-------------|----------------------|----------|---------------------|------------|--------------|------------|----------------------|----------|----------------------|-------|--------------|-------|---------------------|-------|---------------|-------|-------|-------|-------|---|
|                   | A<br>(1-15)        |             | B<br>(16-26)         |          | BC                  |            | C<br>(39-46) |            | C'<br>(47-55)        |          | C''<br>(66-74)       |       | D<br>(75-84) |       | E<br>(85-96)        |       | F<br>(97-104) |       | FG    |       |       |   |
|                   | 1                  | 15          | 16                   | 26       | 27                  | 38         | 39           | 46         | 47                   | 55       | 56                   | 65    | 66           | 74    | 75                  | 84    | 85            | 96    | 97    | 104   | 105   |   |
|                   | .....              | .....       | .....                | .....    | .....               | .....      | .....        | .....      | .....                | .....    | .....                | ..... | .....        | ..... | .....               | ..... | .....         | ..... | ..... | ..... | ..... | . |
| <i>IGHV1-3</i>    | QVQLQESGP.SLVKP    | SQTLSLTCTVS | GFSL...TSYG          | VGWVRQAP | GKALEWLG            | ISSG...GST | GYNPALK.S    | RLSITRDTSK | SQVSLSLSSVTT         | EDTAVYYC | AR                   |       |              |       |                     |       |               |       |       |       |       |   |
| <i>IGHV1-5</i>    | QVQLQESGP.SLVKP    | SQTLSLTCTVS | GVSL...TSYA          | VGWVRQAP | GKALEWLG            | IYSG...GST | YNSPALK.S    | RLSITRDTSK | SQVSLSLSSVTT         | EDTAVYYC | AR                   |       |              |       |                     |       |               |       |       |       |       |   |
| <i>IGHV1-8</i>    | QVQLQESGP.SLVKP    | SQTLSLTCTVS | GFSL...TSYA          | VGWVRQAP | GKALEWVGG           | ISSG...GST | GYNPALK.S    | RLSITRDTSK | SQVSLSLSSVTT         | EDMALYYC | AR                   |       |              |       |                     |       |               |       |       |       |       |   |
| <i>IGHV1S10 P</i> | QVQLQESGP.SLVKP    | SQTLSLPCTDS | GFSL...TSCG          | AGWVRQAP | GKRRSGLGY           | HI.....CG  | TQASTLK.S    | RLSITRDTSK | SQVSLSRSSVTT         | EDTALYYC | AR                   |       |              |       |                     |       |               |       |       |       |       |   |
| <i>IGHV1S11 P</i> | QVQLQESGP.SLVKP    | SQTLSLTFTDS | GFSL...TSYG          | AGWVRQAP | GKAPWVGG            | IDYD...GDT | SYNPALK.S    | RLSITRDTSK | SQVSLSRSSVTT         | EDTAVYYC | AR                   |       |              |       |                     |       |               |       |       |       |       |   |
| <i>IGHV1S13 P</i> | QVQLQESGP.SLVKP    | SQTLSLTCTDS | GFSL...TSYG          | AGWVRQAP | GKAPWVGG            | IDYD...GDT | SYNPALK.S    | RLSITRDTSK | SQVSLSRSSVTT         | EDTALYYC | AR                   |       |              |       |                     |       |               |       |       |       |       |   |
| <i>IGHV1S15</i>   | QVQLQESGP.SLVKP    | SQTLSLTCTDS | GVSL...TSYG          | AGWVRQAP | GKALHWVGG           | VDYD...GDT | SYNPALK.S    | RLSITRDTSK | SQVSLSLSSVTT         | EDTAVYYC | AR                   |       |              |       |                     |       |               |       |       |       |       |   |
| <i>IGHV1S19 P</i> | QVQLQESGP.SLVKP    | SQTLSLTFTDS | GFSL...TSYG          | AGWVRQAP | GKAPWVGG            | IDYD...GDT | SYNPALK.S    | RLSITRDTSK | SQVSLSRSSVTT         | EDTAVYYC | AR                   |       |              |       |                     |       |               |       |       |       |       |   |

**Supplementary Figure 1** Protein display of in-frame *IGHV* genes. Amino acid numbering is based on the IMGT system as discussed in the methods section. Where a specific residue is absent from the protein, the symbol (.) is used as a spacer in order to maintain correct numbering. The location of the CDR loops (BC, C'C'', and FG) and the framework beta-strands (A, B, C, C', etc.) are indicated at top. Putative pseudogenes which have an in-frame variable region are indicated with a (P) beside the gene name

| gene         | 5' D-RS   |              |          | D-REGION                                       | 3' D-RS  |              |            |
|--------------|-----------|--------------|----------|------------------------------------------------|----------|--------------|------------|
|              | NONAMER   | SPACER       | HEPTAMER |                                                | HEPTAMER | SPACER       | NONAMER    |
| <i>IGHD1</i> | GGTCCCAGC | AGGTGTGCATGT | CGCCGTG  | AGAATACCATGATGATAGCTACTGCTATAGC                | CACAGTG  | GCTCAGGCCCTG | ACATAAAGC  |
| <i>IGHD2</i> | GGTTTCTGA | TGCCGGCTGCAT | CATGGTG  | GTAGTTGTTATAGTGGTTATGGTTATGGTTATGGTTATGGTTATGC | CACAGTG  | ACACTCTCTGGG | ACAAAAACC  |
| <i>IGHD3</i> | GGTTTGTGA | TGCCGGCTGCGT | CATGGTG  | GTGATATGATAGGTATGGTTGTAGTTACTGTAGTATCGCTAC     | CACAGTG  | ACACTCTCAGTA | TTAGAAAACC |
| <i>IGHD4</i> | GGTTTCTGA | TGCTGGCTGTGT | TATGGTG  | GTAGTTATTATAGCGATTATGGTTATGC                   | CACAGTG  | ACACTCTCTGGA | ACAAAAACC  |

**Supplementary Figure 2** *IGHD* genomic features. Nucleotide sequence of the four goat *IGHD* genes, including features of both 5' and 3' recombination signals

| gene         | J-RS      |                          |          | J-REGION nt and AA sequences                                                                       | splice site |
|--------------|-----------|--------------------------|----------|----------------------------------------------------------------------------------------------------|-------------|
|              | NONAMER   | SPACER                   | HEPTAMER |                                                                                                    |             |
| <i>IGHJ1</i> | GGGTTTCCA | TGCCCCCAGCACAGGGCCAGCC   | CACTGTG  | ACTATGCTGACTTCCATCTCTGGGACCAGGGTGCCTGGTCACCGTCTCCTCA<br>Y A D F H L W D Q G A L V T V S S          | GG          |
| <i>IGHJ2</i> | TGTTTTTGT | AGGAAAGAAGCAGCAGAAGAGA   | AGCTGTG  | CTGCTGGGACTTGATCTCTGGGGCCAGCGCACCCAGTCACCGCGTCTTGAGCA<br>C W D L D L W G Q R T P V T A S L S       | GT          |
| <i>IGHJ3</i> | TGCTTTTGA | CTCCTGGGGCCAGCACGCCCCGGT | CACAGTT  | TCCTCAGGTGAGACGGCTCTCTGCCCCTCTGTCTGGGCTGGGAAAGAAGTCTCCAGA<br>S S G E T A L C P L C P G L G K K S P | GG          |
| <i>IGHJ4</i> | GGTTTTCGC | ACAGCCCCTAACGGGGCCCATGG  | CACTGTG  | ACTATATTGACTACTGGGGCCAGGACTCCTGGTCACCGTCTCCTCAG<br>Y I D Y <u>W G P G</u> L L V T V S S            | GT          |
| <i>IGHJ5</i> | CGAGCTCGT | GCTTGGGGTCCCAGCATCACTGT  | CACAGTG  | TAACGACTGGCTCAAGCACTGGGGCCAGGGACCCTGGACACTGTCTGCTCA<br>+ R L A Q A L G P G T L D T V C S           | GC          |
| <i>IGHJ6</i> | GGTTTTTGT | TGGGCGAGGCTGGAGATAATCAC  | CACTGTG  | ATTACTACGGTGTAGATGTCTGGGGCCGAGGACTCCTGGTCACCGTCTCCTCAG<br>Y Y G V D V <u>W G R G</u> L L V T V S S | GT          |

**Supplementary Figure 3** *IGHJ* genomic features. Nucleotide sequence and putative amino acid sequence of the six goat *IGHJ* genes, including features of the recombination signal and splice site. The canonical framework motif W/F-G-X-G is underlined where intact. The presence of a premature stop codon in *IGHJ5* is indicated with the symbol (+)

|              | A<br>(1-15)                       | B<br>(16-26) | BC<br>(27-38) | C<br>(39-45) | CD          | D<br>(77-84) | DE                                                        | E<br>(85-96) | EF | F<br>(97-104) | FG<br>(105-117) | G<br>(118-128) |           |     |       |     |            |     |
|--------------|-----------------------------------|--------------|---------------|--------------|-------------|--------------|-----------------------------------------------------------|--------------|----|---------------|-----------------|----------------|-----------|-----|-------|-----|------------|-----|
|              | ----->                            |              |               | ----->       |             |              |                                                           | ----->       |    | ----->        |                 | ----->         |           |     |       |     |            |     |
|              | 1                                 | 15           | 16            | 26           | 27          | 38           | 39                                                        | 45           | 77 | 84            | 85              | 96             | 97        | 104 | 105   | 117 | 118        | 128 |
| <i>IGKC</i>  | 87654321 ..... 123 .....          |              |               |              | .....       |              | ..... 1234567 ..... 12345677654321 ..... 12 .....         |              |    |               | ..... 12 .....  |                | .....     |     | ..... |     | .....      |     |
| <i>IGLC1</i> | .SDAQPSVFLFKPSDEQLR...TGTVSVVCLVN |              |               |              | DFYP...KDIS |              | VKWKVDGVTQNS..NFQNSFTDQDSKK....STYSLSSTLTLSSSEY..QSHNAYAC |              |    |               | EVSHKS..LTTAL   |                | VKSFNKNEC |     |       |     | TKTVKPSECP |     |
| <i>IGLC2</i> | QPKSAPSVTLFPPSTEELN...ANKATVVCLIS |              |               |              | DFYP...GSVT |              | VA+KADGSTITR..NVETTQASKLSN.....SKYAASSYLTLTGSEW..KSKSSYSC |              |    |               | EVTHE....GSTV   |                | KKTVPSECS |     |       |     |            |     |
|              | QPKSAPSVTLFPPSTEELN...ANKATVVCLIS |              |               |              | DFYP...GSVT |              | VVWKADGSTINQ..NVKTTQASKQSN.....SKYAASSYLTLTGSEW..KSKSSYSC |              |    |               |                 |                |           |     |       |     |            |     |

**Supplementary Figure 4** Protein display of *IGKC* and *IGLC* genes. Numbering and features are as described in the methods section and Supplementary Figure 1. A premature stop codon (i.e. position 41 in *IGLC1*) is indicated with the symbol (+)



| gene         | J-RS      |              |          | J-REGION nt and AA sequences                                           | splice site |
|--------------|-----------|--------------|----------|------------------------------------------------------------------------|-------------|
|              | NONAMER   | SPACER       | HEPTAMER |                                                                        |             |
| <i>IGLJ1</i> | GGTTTTGGT | CCGAGGCTCAGT | CACTGTG  | CTTCGTCTTAGGTGGCGGGACCCAGCTCACCGTCCTAG<br>F V L G G G T Q L T V L      | GT          |
| <i>IGLJ2</i> | GGTTTTTGT | GCCAGCCTGTGT | CACTGTG  | TGGTGTTCGGCAGCGGGACCAGGCTGACCGTGCTGG<br>G V <u>F G S G</u> T R L T V L | GT          |

**Supplementary Figure 5** *IGLJ* genomic features. Nucleotide sequence and putative amino acid sequence of both goat *IGLJ* genes, including features of the recombination signal and splice site. The canonical framework motif W/F-G-X-G is underlined where intact

Supplementary Table 3 – *IGLV* genomic features

| <i>IGLV</i> gene    | Fct             | Octamer<br>(promoter) | bp  | ini. | L-PART1<br>(exon 1)<br>(bp) | intron<br>(bp) | splice<br>sites | V-EXON<br>(exon 2)<br>(bp) | V-RS     |                |           | Start of<br>V-EXON<br>(Accession:<br>NC_030824) |
|---------------------|-----------------|-----------------------|-----|------|-----------------------------|----------------|-----------------|----------------------------|----------|----------------|-----------|-------------------------------------------------|
|                     |                 |                       |     |      |                             |                |                 |                            | HEPTAMER | SPACER<br>(bp) | NONAMER   |                                                 |
| <i>IGLV3-1</i>      | P <sup>1</sup>  | ATTGTCAT              | 83  | ATG  | 46                          | 368            | GT/AG           | 293                        | CACAGTG  | 23             | CCCAAACCC | 212,969                                         |
| <i>IGLV3-2</i>      | F               | ATTTGCAT              | 108 | ATG  | 46                          | 144            | GT/AG           | 299                        | CACAGTG  | 23             | ACACAAACC | 217,287                                         |
| <i>IGLV3-3</i>      | F               | ATTTGCAT              | 107 | ATG  | 46                          | 159            | GT/AG           | 302                        | CACAGTG  | 23             | ACAGAAACC | 222,045                                         |
| <i>IGLV3-4</i>      | F               | ATTTGCAT              | 84  | ATG  | 46                          | 145            | GT/AG           | 299                        | CACAGTG  | 23             | ACACAAACC | 230,423                                         |
| <i>IGLV(V)-5</i>    | P <sup>2</sup>  | -                     | -   | -    | -                           | -              | -/AG            | 328                        | CACAGGG  | 23             | GCATACCCC | 234,277                                         |
| <i>IGLV3-6</i>      | P <sup>3</sup>  | ATTTACAT              | 107 | ATG  | 46                          | 145            | GT/AG           | 212                        | -        | -              | -         | 237,612                                         |
| <i>IGLV3-7</i>      | F               | ATTTGCAT              | 84  | ATG  | 46                          | 154            | GT/AG           | 299                        | CACAGTG  | 23             | ACACAAACC | 243,387                                         |
| <i>IGLV3-8</i>      | F               | ATTTGCAT              | 84  | ATG  | 46                          | 154            | GT/AG           | 299                        | CACAGTG  | 23             | ACACAAACC | 248,206                                         |
| <i>IGLV3-9</i>      | P <sup>1</sup>  | ATTTGCAT              | 107 | ATG  | 46                          | 144            | GT/AG           | 298                        | CACAGTG  | 23             | ACACAAACC | 255,357                                         |
| <i>IGLV2-10</i>     | F               | ATTTGCAT              | 97  | ATG  | 46                          | 115            | GT/AG           | 308                        | CACAGTG  | 23             | ACCAAACC  | 263,989                                         |
| <i>IGLV2-11</i>     | F               | ATTTGCAT              | 97  | ATG  | 46                          | 116            | GT/AG           | 308                        | CACAATG  | 23             | ACCAAACC  | 287,348                                         |
| <i>IGLV2-12</i>     | P <sup>4</sup>  | ATTTGCAT              | 97  | GTG  | 46                          | 114            | GT/AG           | 308                        | CACAGTG  | 23             | ACCAAACC  | 302,229                                         |
| <i>IGLV2-13</i>     | P <sup>4</sup>  | ATTTGCAT              | 97  | GTG  | 46                          | 114            | GT/AG           | 308                        | CACAGTG  | 23             | ACCAAACC  | 309,819                                         |
| <i>IGLV2-14</i>     | P <sup>5</sup>  | ATTTGCAT              | 97  | ATG  | 46                          | 113            | GT/AG           | 308                        | CACAGTG  | 23             | GCCAAAACC | 313,327                                         |
| <i>IGLV-15*</i>     | P <sup>6</sup>  | ATTTGTGT              | 95  | ATG  | 46                          | -              | GT/-            | -                          | -        | -              | -         | 317,960                                         |
| <i>IGLV1-16</i>     | P <sup>7</sup>  | CTTTGAAT              | 104 | ATG  | 45                          | 109            | GT/AG           | 300                        | CCCCTG   | 23             | ACAAAGACC | 411,979                                         |
| <i>IGLV1-17</i>     | F               | ATTTGCAT              | 104 | ATG  | 46                          | 108            | GT/AG           | 310                        | CACAGTG  | 23             | ACAAAAACC | 417,143                                         |
| <i>IGLV1-18</i>     | F               | ATTTGCAT              | 107 | ATG  | 46                          | 109            | GT/AG           | 301                        | CACAGTG  | 23             | ACAAAAACC | 434,558                                         |
| <i>IGLV5-19</i>     | P <sup>1</sup>  | ATTTGTAC              | 88  | ATG  | 46                          | 1031           | GT/AG           | 327                        | CACGGTG  | 23             | ATCAAAACA | 438,626                                         |
| <i>IGLV1-20</i>     | F               | ATTTGCAT              | 107 | ATG  | 46                          | 108            | GT/AG           | 307                        | CACGGTG  | 23             | GCAAAAGCC | 450,996                                         |
| <i>IGLV8-21</i>     | P <sup>1</sup>  | ATTTGCAT              | 102 | ATG  | 46                          | 97             | GT/AG           | 304                        | CGCAGTG  | 23             | ACCAAACC  | 454,265                                         |
| <i>IGLV5-22</i>     | P <sup>8</sup>  | ATTTGCAT              | 87  | GTG  | 46                          | 130            | GT/AG           | 307                        | CAGATGA  | 12             | ACAAAAACC | 459,885                                         |
| <i>IGLV1-23</i>     | P <sup>1</sup>  | ATTTGCAT              | 107 | ATG  | 46                          | 110            | GT/AG           | 307                        | CACGGAG  | 23             | ACAAAAACC | 475,878                                         |
| <i>IGLV8-24</i>     | P <sup>1</sup>  | ATTTGCAT              | 110 | ATG  | 37                          | 97             | GA/AG           | 310                        | CGCAGTG  | 23             | ACTAAAACC | 483,773                                         |
| <i>IGLV5-25</i>     | P <sup>9</sup>  | -                     | -   | -    | -                           | -              | -/AG            | 304                        | CACAGCG  | 23             | ACGAGAGCC | 489,083                                         |
| <i>IGLV1-26</i>     | F               | ATTTGCAT              | 107 | ATG  | 46                          | 107            | GT/AG           | 307                        | CACAGTG  | 23             | ACAAAAACC | 489,925                                         |
| <i>IGLV1-27</i>     | P <sup>10</sup> | CTTTGCGA              | 101 | ATC  | 46                          | 124            | CA/AG           | 301                        | CACACTG  | 22             | ACAAAGACC | 493,241                                         |
| <i>IGLV8-28</i>     | P <sup>11</sup> | ATTTGCAT              | 101 | GCG  | 46                          | 97             | GT/AG           | 298                        | CGCAGTG  | 23             | GCCCAAACC | 495,363                                         |
| <i>IGLV8-29</i>     | P <sup>1</sup>  | GTTTGCAT              | 81  | ATG  | 46                          | 98             | GT/AG           | 309                        | CCCAGTG  | 23             | AACAAAACC | 503,044                                         |
| <i>IGLV1-30</i>     | F               | TTTTGCAT              | 108 | ATG  | 46                          | 107            | GT/AG           | 310                        | CACAGTG  | 23             | ACAAAACC  | 509,454                                         |
| <i>IGLV(V)-31</i>   | P <sup>12</sup> | CATTGTAT              | 79  | TCG  | 49                          | 110            | GT/AG           | 324                        | CACAGTG  | 21             | AGAAACCCC | 513,632                                         |
| <i>IGLV8-32</i>     | P <sup>1</sup>  | ATTTGCAT              | 100 | ATG  | 46                          | 97             | GT/AG           | 312                        | CACAGTG  | 23             | ACTAAAACC | 522,876                                         |
| <i>IGLV1-33</i>     | F               | ATTTGCAT              | 104 | ATG  | 46                          | 109            | GT/AG           | 310                        | CACAGTG  | 23             | ACAAAACCT | 556,145                                         |
| <i>IGLV1-34</i>     | P <sup>13</sup> | -                     | -   | ATG  | 46                          | 110            | GT/AG           | 303                        | CACACTG  | 22             | ACAAAGACC | 552,517                                         |
| <i>IGLV5-35</i>     | P <sup>9</sup>  | -                     | -   | -    | -                           | -              | -               | 274                        | CAACAGG  | 23             | ACGGGAAAC | 551,888                                         |
| <i>IGLV1-36</i>     | F               | ATTTGCAT              | 107 | ATG  | 46                          | 109            | GT/AG           | 307                        | CACAGTG  | 23             | ACGAAAACC | 549,592                                         |
| <i>IGLV5-37</i>     | P <sup>2</sup>  | -                     | -   | -    | -                           | -              | -/AG            | 327                        | CATGGTG  | 23             | ACAGAAACC | 545,604                                         |
| <i>IGLV1-38</i>     | P <sup>1</sup>  | ATTTGCAT              | 107 | ATG  | 46                          | 108            | GT/AG           | 305                        | CACAGTG  | 23             | GCAAAAGCC | 540,991                                         |
| <i>IGLV8-39</i>     | P <sup>1</sup>  | GATTGCAT              | 102 | ATG  | 46                          | 97             | GT/AG           | 304                        | CGCAGTG  | 23             | ACCAAACC  | 537,744                                         |
| <i>IGLV5-40</i>     | P <sup>2</sup>  | -                     | -   | -    | -                           | -              | -               | 319                        | CAGCCTG  | 23             | CGTCAAATC | 533,180                                         |
| <i>IGLV1-41</i>     | F               | ATTTGCAT              | 107 | ATG  | 46                          | 109            | GT/AG           | 310                        | CACAGTG  | 23             | ACAAAACC  | 532,312                                         |
| <i>IGLV1-42</i>     | P <sup>1</sup>  | CTTTGAAT              | 104 | ATG  | 46                          | 109            | GT/AG           | 302                        | CCCAGTG  | 23             | ACAAAGACC | 528,740                                         |
| <i>IGLV1-43</i>     | P <sup>1</sup>  | unknown               | >78 | ATG  | 47                          | 109            | GT/AG           | 309                        | CACAGTG  | 23             | ACAAAACC  | 523,595                                         |
| <i>IGLV(V)-44</i>   | P <sup>12</sup> | CATTGTAT              | 79  | TCG  | 49                          | 110            | GT/AG           | 310                        | CACAGTG  | 19             | ACAGAAACC | 562,851                                         |
| <i>IGLV8-45</i>     | F               | ATTTGCAT              | 102 | ATG  | 46                          | 99             | GT/AG           | 310                        | CACAGTG  | 23             | ACTAAAACC | 572,182                                         |
| <i>IGLV1-46</i>     | F               | ATTTGCAT              | 107 | ATG  | 46                          | 107            | GT/AG           | 310                        | CACAGTG  | 23             | ACAAAACG  | 578,333                                         |
| <i>IGLV1-47</i>     | P <sup>7</sup>  | ATTTGCAT              | 105 | ATG  | 45                          | 109            | GT/AG           | 303                        | CACACTG  | 22             | ACAAAGACC | 582,982                                         |
| <i>IGLV5-48</i>     | F               | ATTTGCAT              | 88  | ATG  | 46                          | 118            | TA/AG           | 328                        | CACGGTG  | 23             | ACAGAAACC | 589,134                                         |
| <i>IGLV1-49</i>     | F               | ATTTGCAT              | 104 | ATG  | 46                          | 107            | GT/AG           | 307                        | CACAGTG  | 23             | ACGAAAACC | 593,240                                         |
| <i>IGLV1-50</i>     | F               | ATTTGCAT              | 98  | ATG  | 46                          | 109            | GT/AG           | 310                        | CACAGTG  | 23             | ACGAAAGCC | 600,330                                         |
| <i>IGLV5-51</i>     | P <sup>1</sup>  | ATTTGCAT              | 89  | GTG  | 45                          | 118            | GT/AG           | 330                        | CCCGGTG  | 21             | ACACAAAGA | 604,402                                         |
| <i>IGLV1-52</i>     | F               | ATTTGCAT              | 107 | ATG  | 46                          | 109            | GT/AG           | 310                        | CACAGTG  | 22             | ACAAAACC  | 607,665                                         |
| <i>IGLV1-53</i>     | F               | ATTTGCAT              | 104 | ATG  | 46                          | 109            | GT/AG           | 310                        | CACAGTG  | 23             | ACAAAACC  | 616,478                                         |
| <i>IGLV5-54</i>     | P <sup>2</sup>  | -                     | -   | -    | -                           | -              | -/AG            | 314                        | CACTGGT  | -              | -         | 618,853                                         |
| <i>IGLV(V)-55</i>   | P <sup>1</sup>  | CTTTGAAT              | 78  | ATG  | 49                          | 110            | GT/AG           | 309                        | CACAGTG  | 21             | AGAAACCCC | 621,317                                         |
| <i>IGLV8-56</i>     | P <sup>1</sup>  | ATTTGCAT              | 102 | ATG  | 46                          | 99             | GT/AG           | 309                        | CACAGTG  | 23             | ACTAAAACC | 630,796                                         |
| <i>IGLV8-57</i>     | P <sup>9</sup>  | -                     | -   | -    | -                           | -              | -               | 228                        | -        | -              | -         | 635,129                                         |
| <i>IGLV1-58</i>     | F               | ATTTGCAT              | 108 | ATG  | 46                          | 109            | GT/AG           | 310                        | CACAGTG  | 23             | ACAAAACCT | 637,563                                         |
| <i>IGLV1-59</i>     | P <sup>1</sup>  | GTTTGAAT              | 105 | ATG  | 46                          | 110            | GT/AG           | 303                        | CCCAGTG  | 19             | ACAAAGACC | 640,871                                         |
| <i>IGLV5-60</i>     | F               | ATTTGCAT              | 89  | ATG  | 46                          | 118            | GT/AG           | 328                        | CACGGTG  | 23             | ACAGAAACC | 645,084                                         |
| <i>IGLV1-61</i>     | F               | ATTTGCAT              | 107 | ATG  | 46                          | 109            | GT/AG           | 304                        | CACGGTG  | 23             | ACAAAACC  | 647,866                                         |
| <i>IGLV5-62</i>     | P <sup>14</sup> | ATTTGCAT              | 88  | ATG  | 45                          | 118            | GT/AG           | 325                        | CCAGGTG  | 21             | ACAGGCACT | 652,760                                         |
| <i>IGLV(III)-63</i> | P <sup>9</sup>  | -                     | -   | -    | -                           | -              | -               | 204                        | -        | -              | -         | 657,169                                         |

*Fct* functionality, *F* functional, *P* pseudogene; *ini* initiation codon  
\*; accession coordinate is for translation initiation site in exon 1  
1; frameshifts and stop codons in V-EXON  
2; exon 1 is missing, multiple frameshifts and stop codons in V-EXON  
3; truncated V-EXON with frameshifts and stop codons  
4; mutated start codon (M>V)  
5; stop codon at position 1 of V-EXON  
6; V-EXON is missing  
7; stop codon in exon 1, frameshifts and stop codons in V-EXON  
8; mutated start codon (M>V), frameshifts and stop codons in V-EXON  
9; exon 1 is missing, truncated V-EXON with frameshifts and stop codons  
10; mutated start codon (M>I), multiple frameshifts and stop codons in V-EXON  
11; mutated start codon (M>A), frameshifts and stop codons in V-EXON  
12; mutated start codon (M>S), frameshifts and stop codons in V-EXON  
13; octamer missing, frameshifts and stop codons in V-EXON  
14; frameshift in exon 1

|                   | FR1-IMGT<br>(1-26) |                 | CDR1-IMGT<br>(27-38) |             | FR2-IMGT<br>(39-55) |          | CDR2-IMGT<br>(56-65) |            | FR3-IMGT<br>(66-104) |            |                | CDR3-IMGT<br>(105-117) |              |    |              |    |               |    |    |     |     |     |
|-------------------|--------------------|-----------------|----------------------|-------------|---------------------|----------|----------------------|------------|----------------------|------------|----------------|------------------------|--------------|----|--------------|----|---------------|----|----|-----|-----|-----|
|                   | A<br>(1-15)        |                 | B<br>(16-26)         |             | BC                  |          | C<br>(39-46)         |            | C'<br>(47-55)        |            | C''<br>(66-74) |                        | D<br>(75-84) |    | E<br>(85-96) |    | F<br>(97-104) |    | FG |     |     |     |
|                   | 1                  | 15              | 16                   | 26          | 27                  | 38       | 39                   | 46         | 47                   | 55         | 56             | 65                     | 66           | 74 | 75           | 84 | 85            | 96 | 97 | 104 | 105 | 113 |
| <i>IGLV1-17</i>   | QAVLTQPSS.VSKSL    | QAVLTQPSS.VSKSL | GQSVSITCSGS          | GQSVSITCSGS | SSNVG...YGNV        | VSWYQQVP | GSAPKLLIY            | GA.....T   | SRASGVP.A            | RFSGSR..SG | NTATLSISLQA    | EDEADYYC               | ASYDSSSYN    |    |              |    |               |    |    |     |     |     |
| <i>IGLV1-18</i>   | QAVLTQPSS.VSGSP    | QAVLTQPSS.VSGSP | GQRVSITCSGS          | GQRVSITCSGS | NIG.....SSG         | VGWYQQLP | GSGLKTVIY            | YN.....S   | NRPSGVP.D            | RFSGSK..SG | NTATLTISLQA    | EDEADYYC               | GSYDSSSYN    |    |              |    |               |    |    |     |     |     |
| <i>IGLV1-20</i>   | QAVLTQPSS.VSRSL    | QAVLTQPSS.VSRSL | GQRVTITCSGS          | GQRVTITCSGS | SSNT...GGNF         | VGWCQQLP | GMAPKTLIY            | GD.....S   | NRPSGVP.G            | WFSGSK..SG | NSASMTIASLQA   | KEEAGYYC               | LSWDDSLNC    |    |              |    |               |    |    |     |     |     |
| <i>IGLV1-26</i>   | QAVLTQPPS.VSGSP    | QAVLTQPPS.VSGSP | GQSVSITCTGS          | GQSVSITCTGS | SSNI...GRYG         | VAWYQQLP | GSAPKLLIY            | CT.....T   | SGALGSS.D            | RFSCSM..SG | NTATLTISLQA    | EDEADYYC               | ATYDSSSYN    |    |              |    |               |    |    |     |     |     |
| <i>IGLV1-30</i>   | QAVLTQPPS.VSRSL    | QAVLTQPPS.VSRSL | GQRVSITCSGS          | GQRVSITCSGS | SSNVG...YGNV        | VGWYQQVP | GSGLRLLIY            | GA.....T   | SRASGVP.D            | RFSGSR..SG | NTATLTISLQA    | EDEADYYC               | SSYDSSSYN    |    |              |    |               |    |    |     |     |     |
| <i>IGLV1-33</i>   | QAVLTQPPS.VSRSP    | QAVLTQPPS.VSRSP | GQRVFITCSGS          | GQRVFITCSGS | SSNVG...TGNY        | VGWYQQVP | GSAPKLLIY            | GA.....T   | SRASGVP.D            | RFSGSR..SG | NTATLTISLQA    | EDEADYYC               | SSYQSGYSY    |    |              |    |               |    |    |     |     |     |
| <i>IGLV1-36</i>   | QAVLTQPPS.VSGSP    | QAVLTQPPS.VSGSP | GQRVSITCSGS          | GQRVSITCSGS | SSNI...GSSG         | VAWFQQLP | GSGLRIVIY            | YS.....S   | NRPSGVP.D            | RFSGSR..SG | NTATLTISLQA    | EDEADYYC               | ASYQSGYSY    |    |              |    |               |    |    |     |     |     |
| <i>IGLV1-41</i>   | QAVLTQPPS.VSGSP    | QAVLTQPPS.VSGSP | GQRVSITCSGS          | GQRVSITCSGS | SSNIG...GGNY        | VSWYQQLP | GSAPKLLIY            | CT.....S   | SRASGVP.D            | RFSGSR..SG | NTATLTISLQA    | EDEADYYC               | ATYESSSYN    |    |              |    |               |    |    |     |     |     |
| <i>IGLV1-46</i>   | QAVLTQPPS.VSGSP    | QAVLTQPPS.VSGSP | GQRVSITCTGS          | GQRVSITCTGS | SSNIG...GGNY        | VGWYQQLP | GSGLRLLIY            | ST.....S   | SRPSGVP.D            | RFSGSR..SG | NTATLTISLQA    | EDEADYYC               | ATYESSSYN    |    |              |    |               |    |    |     |     |     |
| <i>IGLV1-49</i>   | QAVLTQPPS.VSGSL    | QAVLTQPPS.VSGSL | GQRVSITCSGS          | GQRVSITCSGS | SSNI...GRGY         | GSWYQQLP | GSAPKLLIY            | GA.....T   | SRASGVP.D            | RFSGSR..SG | NTATLTISLQA    | EDEADYYC               | AAYDSSSSN    |    |              |    |               |    |    |     |     |     |
| <i>IGLV1-50</i>   | QAVLTQPPS.VSRSL    | QAVLTQPPS.VSRSL | GQSVSITCSGS          | GQSVSITCSGS | SSNIG...GGYV        | VGWYQQIP | GSAPKLLIY            | QN.....S   | KRPTGVP.N            | RFSGSK..SG | STATLTISLQA    | EDEADYYC               | SAYDSSISA    |    |              |    |               |    |    |     |     |     |
| <i>IGLV1-52</i>   | QAVLTQPPS.VSRSP    | QAVLTQPPS.VSRSP | GQRVFITCSGS          | GQRVFITCSGS | SSNVG...TGNY        | VGWYQQVP | GSAPKLLIY            | GA.....T   | SRASGVP.D            | RFSGSR..SG | NTATLTISLQA    | EDEADYYC               | SSYQSGYSY    |    |              |    |               |    |    |     |     |     |
| <i>IGLV1-53</i>   | QAVLTQPPS.VSKSL    | QAVLTQPPS.VSKSL | GQSVSITCSGS          | GQSVSITCSGS | SSNVG...YGNV        | VGWYQQVP | GSAPKLLIY            | GA.....T   | SRASGVP.A            | RFSGSR..SG | NTATLSISLQA    | EDEADYYC               | ASYDSSSYN    |    |              |    |               |    |    |     |     |     |
| <i>IGLV1-58</i>   | QAVLTQPPS.VSASL    | QAVLTQPPS.VSASL | GQRVSIFCNGS          | GQRVSIFCNGS | SSNIG...GGNY        | VGWYQLIP | GSGLRLLIY            | GT.....T   | GRPSGVL.D            | RFSGSR..SG | NTATLTITSLQA   | EDEVYDYYC              | ATYDSSSYN    |    |              |    |               |    |    |     |     |     |
| <i>IGLV1-61</i>   | HAVLTQPPS.VSGSL    | HAVLTQPPS.VSGSL | GQSVTISCSGS          | GQSVTISCSGS | SSNI...GILG         | VSWYQQLQ | GSAPKLLIY            | GS.....N   | KRPSGVP.D            | RFSGTK..SG | NTGTLTITSLQA   | EDEADYYC               | ASADLILNS    |    |              |    |               |    |    |     |     |     |
| <i>IGLV2-10</i>   | QSALTQPAS.VSGNP    | QSALTQPAS.VSGNP | GQTVTISCTGT          | GQTVTISCTGT | SSDIG...SYNG        | VGWYQQLP | GSAPKLLIY            | NL.....N   | KRPSGIP.A            | RFSGSK..SG | NTATLTISGLQA   | EDEADYYC               | SSYKSGGTV    |    |              |    |               |    |    |     |     |     |
| <i>IGLV2-11</i>   | QSALTQPAS.VSGNP    | QSALTQPAS.VSGNP | GQTVTISCTGT          | GQTVTISCTGT | SSDIG...GYNV        | IGWYQQLP | GSAPKLLIY            | NL.....N   | KRPSGIP.A            | RFSGSK..SG | NTATLTISGLQA   | EDEADYYC               | SSYKSGGTV    |    |              |    |               |    |    |     |     |     |
| <i>IGLV2-12 P</i> | QSALTQPAS.VSGNP    | QSALTQPAS.VSGNP | GQTVTISCTGT          | GQTVTISCTGT | SSDIG...GYNV        | VGWYQQLP | GSAPKLLIY            | EV.....S   | KRPSGIP.A            | RFSGSK..SG | NTATLTISGLQA   | EDEADYYC               | SSPKSGYTV    |    |              |    |               |    |    |     |     |     |
| <i>IGLV2-13 P</i> | QSALTQPAS.VSGNP    | QSALTQPAS.VSGNP | GQTVTISCTGT          | GQTVTISCTGT | SSDIG...GYNV        | VGWYQQLP | GSAPKLLIY            | NV.....N   | NRPSGIP.A            | RFSGSK..SG | NTATLTISGLQA   | EDEADYYC               | SSPRSGYTV    |    |              |    |               |    |    |     |     |     |
| <i>IGLV2-14 P</i> | +SGLTQPAS.VSGNP    | +SGLTQPAS.VSGNP | GQTVTISCTGT          | GQTVTISCTGT | SSDIG...GYNV        | VGWYQQLP | GSAPKLLIY            | NV.....N   | NRPSGIP.A            | RFSGSK..SG | NTATLTISELQA   | EDEADYYC               | SSARSHTV     |    |              |    |               |    |    |     |     |     |
| <i>IGLV3-2</i>    | SSQLTQPPA.VSVSL    | SSQLTQPPA.VSVSL | GQTASITCQGD          | GQTASITCQGD | DLA.....FLS         | ANWYQLKP | GQAPVTVIY            | GG.....S   | DRASGIP.D            | RFSGSK..SD | TTATLTIRGAQA   | EDEADYYC               | QSGGIDVDA    |    |              |    |               |    |    |     |     |     |
| <i>IGLV3-3</i>    | SYELTQPTS.VSVVL    | SYELTQPTS.VSVVL | GQTAKVTCQGD          | GQTAKVTCQGD | LLD.....EQY         | TQWHQKPK | GQAPKLLIY            | ED.....S   | KRRSGIP.D            | RFSGSS..SS | KTALITISGVRA   | EDEADYYC               | VSWDSGNYNI   |    |              |    |               |    |    |     |     |     |
| <i>IGLV3-4</i>    | SYELTQPTS.VSVAL    | SYELTQPTS.VSVAL | GQTAKVTCQGD          | GQTAKVTCQGD | LLD.....EKY         | TAWYQKPK | GQAPVKVIC            | KD.....S   | ERPSGIL.D            | RFSGSS..SG | KTATLTISGART   | EDEADYYC               | LSADSSNNP    |    |              |    |               |    |    |     |     |     |
| <i>IGLV3-7</i>    | SYELTQPTS.VSVAL    | SYELTQPTS.VSVAL | GQTAKVTCQGD          | GQTAKVTCQGD | LLD.....ENF         | AHMYQKPK | GQAPVLVIY            | LN.....S   | ERASGIP.D            | RFSGSS..SG | STATLTISGVQA   | EDEADYYC               | QSYDSSNNP    |    |              |    |               |    |    |     |     |     |
| <i>IGLV3-8</i>    | SYELTQPTS.VSVAL    | SYELTQPTS.VSVAL | GQTAKVTCQGD          | GQTAKVTCQGD | NLG.....SSY         | VQWHQKPK | GQAPVTVIY            | QD.....S   | KRPSGIP.D            | RFSGSN..SG | NTATLTISGART   | EDEADYYC               | QSADSSNNP    |    |              |    |               |    |    |     |     |     |
| <i>IGLV5-48</i>   | QPVLTPAS.LSASP     | QPVLTPAS.LSASP  | VTSARLSTLS           | VTSARLSTLS  | SGYNV...GDFS        | LSWFQKPK | GSPPWYVVR            | VKSD...SDK | NQSSGVP.S            | NFFGSKDASA | NAGLLLISGLQP   | EDEADYYC               | AVWHGDTNA    |    |              |    |               |    |    |     |     |     |
| <i>IGLV5-60</i>   | QPLLTQPAS.LSASP    | QPLLTQPAS.LSASP | GASARLTCTLS          | GASARLTCTLS | SGYNV...GNYS        | IYWYQKKA | GSPPRYLLR            | FKSD...SDK | HQSGGVP.N            | RFSGSKDAST | NAGLLLISEVQP   | EDEADYYC               | AVWHGDTNA    |    |              |    |               |    |    |     |     |     |
| <i>IGLV5-62 P</i> | QPVLTPAS.LSASP     | QPVLTPAS.LSASP  | GASARLSTLS           | GASARLSTLS  | SGYSA...GSYQ        | MSCFQKPK | GGPPQYLLM            | FKSH...SDK | PQGSRVP.S            | HFGSKAASA  | NTELLLISGLQT   | PDEADCNC               | YCHQNTGI     |    |              |    |               |    |    |     |     |     |
| <i>IGLV8-45</i>   | AQTVIQEPA.LSVSP    | AQTVIQEPA.LSVSP | GGTVTLACALS          | GGTVTLACALS | SGSVT...TYNE        | PSWYQKTP | GQVPRNVIY            | NT.....N   | TRASGVP.D            | RFSASI..SG | NKATLTITGAQP   | EDEADYHC               | LLYQSGSGYS   |    |              |    |               |    |    |     |     |     |

**Supplementary Figure 6** Protein display of in-frame *IGLV* genes. Numbering and features are as described in the methods section and Supplementary Figure 1. A premature stop codon (i.e. position 1 of *IGLV2-14*) is indicated with the symbol (+)

Supplementary Table 4 – *IGKV* genomic features

| <i>IGKV</i><br>gene | Fct            | Octamer<br>(promoter) | bp  | ini. | L-PART1<br>(exon 1)<br>(bp) | intron<br>(bp) | splice<br>sites | V-EXON<br>(exon 2)<br>(bp) | V-RS     |                |            | Start of<br>V-EXON<br>(Accession:<br>NC_030818) |
|---------------------|----------------|-----------------------|-----|------|-----------------------------|----------------|-----------------|----------------------------|----------|----------------|------------|-------------------------------------------------|
|                     |                |                       |     |      |                             |                |                 |                            | HEPTAMER | SPACER<br>(bp) | NONAMER    |                                                 |
| <i>IGKV1-1</i>      | F              | ATTTGCAT              | 91  | ATG  | 49                          | 125            | GA/AG           | 302                        | GTGTCAC  | 12             | AAACCACCC  | 46,904,452                                      |
| <i>IGKV1-2</i>      | F              | ATTTGCAT              | 95  | ATG  | 56                          | 206            | GT/AG           | 293                        | CACTGTT  | 12             | ATAAACAGT  | 46,895,815                                      |
| <i>IGKV1-3</i>      | F              | ATTTGCAT              | 93  | ATG  | 52                          | 123            | GT/AG           | 298                        | CACAGTG  | 12             | ACATAAGCC  | 46,880,251                                      |
| <i>IGKV(II)-4</i>   | P <sup>1</sup> | -                     | -   | -    | -                           | -              | -               | 267                        | TACTGCT  | 8              | GCAAAAACCT | 46,871,611                                      |
| <i>IGKV1-5</i>      | P <sup>2</sup> | ATTTGCAG              | 93  | ATG  | 49                          | 114            | GT/AG           | 289                        | CCCTCTG  | 12             | ACAAAATCC  | 46,864,699                                      |
| <i>IGKV1-6</i>      | P <sup>2</sup> | ATTTGCAT              | 93  | ATG  | 52                          | 527            | TG/AG           | 295                        | TACAGTG  | 12             | ACATAAACC  | 46,854,461                                      |
| <i>IGKV2-7</i>      | F              | ATTTGCAT              | 100 | ATG  | 49                          | 345            | GT/AG           | 313                        | CACAGTG  | 12             | ACACAAACC  | 46,850,568                                      |
| <i>IGKV2-8</i>      | F              | ATTTGCAT              | 100 | ATG  | 49                          | 390            | GT/AG           | 313                        | CACAGTG  | 12             | ACAGAAACC  | 46,841,338                                      |
| <i>IGKV2-9</i>      | F              | ATTTGCAT              | 100 | ATG  | 49                          | 412            | GT/AG           | 315                        | CACAGTG  | 12             | ACACAAACC  | 46,835,433                                      |
| <i>IGKV2-10</i>     | F              | ATTTGCAT              | 99  | ATG  | 49                          | 413            | GT/AG           | 313                        | CACAGTG  | 12             | ACACAAACC  | 46,809,111                                      |
| <i>IGKV2-11</i>     | F              | ATTTGCAT              | 100 | ATG  | 49                          | 389            | GT/AG           | 313                        | CACAGTG  | 12             | ACATAAACC  | 46,797,570                                      |
| <i>IGKV1-12</i>     | P <sup>3</sup> | ATTTACAT              | 95  | ATA  | 50                          | 131            | AG/AG           | 291                        | CACAGTA  | 12             | ACATAAACC  | 46,790,983                                      |
| <i>IGKV2-13</i>     | P <sup>2</sup> | ATTTGCAC              | 100 | ATG  | 49                          | 387            | CC/AG           | 312                        | CACAGTG  | 12             | ATACAAATC  | 46,784,160                                      |
| <i>IGKV3-14</i>     | P <sup>4</sup> | -                     | -   | -    | -                           | -              | -/AG            | 296                        | TCGAGTG  | 12             | ACAAAACC   | 46,776,180                                      |
| <i>IGKV1-15</i>     | P <sup>5</sup> | GATTACAT              | 83  | ATG  | 49                          | 132            | GG/AG           | 292                        | CACAGTG  | 12             | AAATGGCAA  | 46,771,640                                      |

*Fct* functionality, *F* functional, *P* pseudogene; *ini* initiation codon

1; exon 1 is missing, multiple frameshifts, stop codons in V-EXON which is also truncated

2; frameshifts, stop codons in V-EXON

3; mutated start codon (M>I), stop codon at position 103

4; exon 1 is missing, multiple frameshifts, stop codons in V-EXON

5; stop codon in L-PART1

|                   | FR1-IMGT<br>(1-26) |    | CDR1-IMGT<br>(27-38) |    | FR2-IMGT<br>(39-55) |    | CDR2-IMGT<br>(56-65) |    | FR3-IMGT<br>(66-104) |    |          |    | CDR3-IMGT<br>(105-117) |    |            |    |              |    |          |     |           |     |  |
|-------------------|--------------------|----|----------------------|----|---------------------|----|----------------------|----|----------------------|----|----------|----|------------------------|----|------------|----|--------------|----|----------|-----|-----------|-----|--|
|                   | A<br>(1-15)        |    | B<br>(16-26)         |    | BC                  |    | C' C''               |    | C''                  |    | D        |    | E                      |    | F          |    | FG           |    |          |     |           |     |  |
|                   | 1                  | 15 | 16                   | 26 | 27                  | 38 | 39                   | 46 | 47                   | 55 | 56       | 65 | 66                     | 74 | 75         | 84 | 85           | 96 | 97       | 104 | 105       | 113 |  |
|                   | .....              |    | .....                |    | .....               |    | .....                |    | .....                |    | .....    |    | .....                  |    | .....      |    | .....        |    | .....    |     | .....     |     |  |
| <i>IGKV1-1</i>    | DIQVTQSPSSLSACL    |    | GDRVSITCQAS          |    | QNI.....DTK         |    | LAWYQQKP             |    | RKAPKLLIY            |    | AV.....S |    | RSPSWFP.S              |    | QFSGSG..FG |    | IDFILTISLKA  |    | DDIATYYC |     | QQDHGLPPT |     |  |
| <i>IGKV1-2</i>    | EAVLYQTPAYIAVPL    |    | GESISITCRAN          |    | QSI.....SDY         |    | LSWHKQKP             |    | GQAPMILII            |    | DA.....D |    | NRRNGVP.E              |    | RFTATQ..SG |    | TDFVFTISQIEA |    | DDAAMYVC |     | QQSYVFPP  |     |  |
| <i>IGKV1-3</i>    | DIQVTQSPSSLSASL    |    | TERVSITCRTS          |    | QSV.....SNY         |    | LNWYQQKP             |    | GQAPKLLIY            |    | YA.....T |    | RLHTDVP.S              |    | RFGSGG..SG |    | TDYTLTISLEA  |    | DDAATYYC |     | LQGYSTP   |     |  |
| <i>IGKV1-12 P</i> | DLQMIQSLSSLSASL    |    | GDRVSITCQAS          |    | QSV.....RNN         |    | LQWYQEKP             |    | GKAPEFLFC            |    | DT.....T |    | SVHTGVP.S              |    | RFGSGG..SG |    | TDYAFTTSSLEA |    | DDFAAY+C |     | KQENSRP   |     |  |
| <i>IGKV1-15 P</i> | DLQMTQSPSPFFASL    |    | GDAITWQASQS          |    | IS.....KY           |    | LAWYQQKP             |    | GKAPKLLIF            |    | RA.....S |    | RLHTGVP.S              |    | WFGSGG..SG |    | TDYTLTISELEA |    | DDVATYYC |     | QQYNSIP   |     |  |
| <i>IGKV2-7</i>    | DVVLTQTPLSLSVIP    |    | GETASISCKSS          |    | QSLVHS.DGKTY        |    | LNWIKHKP             |    | GQSPEGLII            |    | QV.....S |    | NRYSGVS.D              |    | RLTGSG..SG |    | TDFFTISRVA   |    | EDAGVYYC |     | YQGTEAP   |     |  |
| <i>IGKV2-8</i>    | AMMQTQTLRSLSVIH    |    | GEKASISCRAS          |    | QSIQNR.YGYNF        |    | LHWYVQKP             |    | SQSPQLLIY            |    | RA.....S |    | NWESGVP.D              |    | RFTSSG..LG |    | ADTILIVSRVEA |    | EDARVYYC |     | QQSLQAP   |     |  |
| <i>IGKV2-9</i>    | DIVLTQTPLSLSVIP    |    | GGTVSISCKSS          |    | QSLKYS.DGKTY        |    | LSWFQHKP             |    | GQSPRRLII            |    | QV.....S |    | NRNTGVP.D              |    | RFTGSG..AE |    | TDFTLPISSVQA |    | EDAGVY.C |     | SFQATYYDP |     |  |
| <i>IGKV2-10</i>   | DVVLTQTPLSLSVIP    |    | GGTASISCKSS          |    | QSLKYS.DGNTY        |    | LYWFQHKP             |    | GQSPRRLII            |    | LV.....S |    | NRDTGVP.D              |    | RFTGSG..AE |    | TDFTLTISVQA  |    | EDAGVYYC |     | FQAINYP   |     |  |
| <i>IGKV2-11</i>   | AIVLTQTPRSLSVIP    |    | GETASISCRAS          |    | QSVQNR.YGDNF        |    | LHWYVQKP             |    | SQSPQLLIY            |    | AA.....S |    | NRASGVS.D              |    | RFTGSG..SG |    | TDFTLKISRVEA |    | EDAGVYYC |     | QQSKETP   |     |  |

**Supplementary Figure 7** Protein display of in-frame *IGKV* genes. Numbering and features are as described in the methods section and Supplementary Figure 1. A premature stop codon (i.e. position 103 of *IGKV1-12*) is indicated with the symbol (+)
